# Supplementary material for: Enhanced muscle MRI using deep learning: shorter acquisition time with improved image quality
Source: PeerJ journal article supplement (doi:10.7717/peerj.21012), 2026-03-19
Supplement: Figure_S1.pdf [file Figure_S1.pdf]

## Appendix

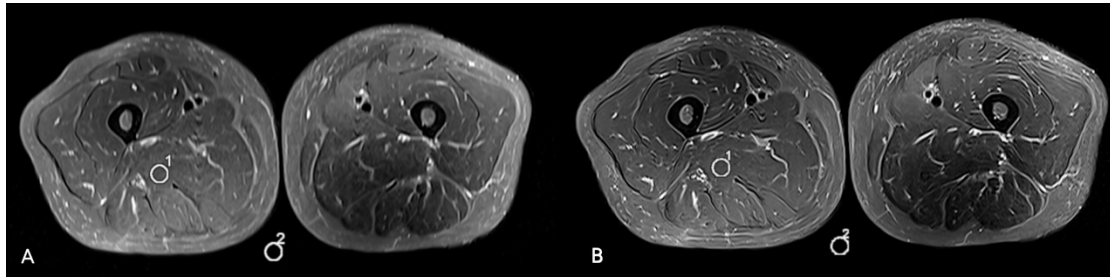

**Figure S1 Measurement of SNR for both sequences in control group.** (A) Standard T2WI TSE fat-suppressed image. (B) T2WI TSE<sub>DL</sub> fat-suppressed image. 1 = region of interest (ROI) of normal thigh muscle area; 2 = ROI of air.
